# Supplementary material for: High surface activity of Fe-doped NiCoP for the hydrogen evolution reaction
Source: Royal Society of Chemistry journal article supplement (doi:10.1039/d3nj02404k), 2023-01-01
Supplement: d3nj02404k1.pdf [file d3nj02404k1.pdf]

Supporting Information for

## **High surface activity of Fe-doped NiCoP for hydrogen evolution reaction**

Shifan Zhu,<sup>ab</sup> Yixue Xu,<sup>ab</sup> Dong Li,<sup>ab</sup> Lili Song<sup>c</sup> and Yuqiao Wang<sup>\*ab</sup>

<sup>a</sup> Research Center for Nano Photoelectrochemistry and Devices, School of Chemistry and Chemical Engineering, Southeast University, Nanjing 211189, China.

<sup>b</sup> Yangtze River Delta Carbon Neutrality Strategy Development Institute, Southeast University, Nanjing 210096, China

<sup>c</sup> School of Chemistry and Materials Science, Nanjing Normal University, Nanjing 210023, China

\*Corresponding author. E-mail: yqwang@seu.edu.cn (Y. Wang)

## DFT Calculation and Experimental Section

**DFT Calculation:** The theoretical calculations were performed based on density functional theory (DFT) using the Vienna ab initio simulation package (VASP). The ion-electron interactions were estimated by the projected augmented wave pseudopotential. The exchange-correlation energy was determined by Perdew-Burke-Ernzerhof functional based on the generalized gradient approximation. The slab models were based on the (111) plane of NiCoP and a vacuum layer of 15 Å was applied to exclude interactions in nonperiodic directions. The energy cutoff of 480 eV and Monkhorst-Pack k-points of 3×3×1 were employed to optimize the slab models and calculate the change of Gibbs free energy. The ionic force and energy convergence were set as 0.02 eV Å<sup>-1</sup> and 10<sup>-6</sup> eV, respectively. The adsorption energy of H\* ( $\Delta E_1$ ) and H<sub>2</sub>O ( $\Delta E_2$ ) could be calculated as following:

$$\Delta E_1 = E_{H^*} - (E^* + \frac{1}{2}E_{H_2}) \quad (1)$$

$$\Delta E_2 = E_{H_2O^*} - (E^* + E_{H_2O}) \quad (2)$$

Where  $E_{H^*}$  is the surface adsorption energy of hydrogen on the catalyst,  $E^*$  is the energy of catalyst,  $E_{H_2}$  is the formation energy of H<sub>2</sub>,  $E_{H_2O^*}$  is the surface adsorption energy of H<sub>2</sub>O on the catalyst,  $E_{H_2O}$  is the energy of H<sub>2</sub>O.

The Gibbs free energy for H\* adsorption was determined by following equation:

$$\Delta G_{H^*} = \Delta E + \Delta E_{ZPE} - T\Delta S \quad (3)$$

Where  $\Delta E_{ZPE}$  and  $\Delta E$  represent the differences in the zero-point energy and total energy difference between the reactant and product models in each step,  $\Delta S$  is the entropic contribution.

**Preparation of Fe-NiCoP:** Firstly, Ni foam substrate was cleaned in 3.0 M HCl and washed with deionized water and ethanol for three times. Ni(NO<sub>3</sub>)<sub>2</sub>·6H<sub>2</sub>O (4 mmol), Co(NO<sub>3</sub>)<sub>2</sub>·6H<sub>2</sub>O (2 mmol), Fe(NO<sub>3</sub>)<sub>3</sub>·9H<sub>2</sub>O (2 mmol), NH<sub>4</sub>F·6H<sub>2</sub>O (8 mmol) and urea (20 mmol) were dissolved in 60 mL deionized water under stirring for 30 mins to form a homogeneous solution. The solution was transferred into 100 mL Teflon-lined stainless autoclave with a piece of 3×4 cm Ni foam. The autoclave was remained at 120 °C for 9 h. Fe-NiCo hydroxide precursor was obtained after drying at 60 °C for 8 h under vacuum. Then, the phosphorization process of Fe-NiCo precursor was conducted by using NaH<sub>2</sub>PO<sub>2</sub> (4 mmol) as the phosphorus source in a tube furnace at 300 °C for 2 h under Ar<sub>2</sub> atmosphere with a heating rate of 5 °C min<sup>-1</sup>. NiCoP was prepared according to the above method without Fe(NO<sub>3</sub>)<sub>3</sub>·9H<sub>2</sub>O. All the chemicals were analytical grade without further purification.

**Characterizations:** The morphologies and microstructure were characterized by scanning electron microscopy (SEM, Inspect F50, FEI) and transmission electron microscopy (TEM, F200X, Talos). The crystal structure was analyzed by X-ray diffraction (XRD, Ultima IV, Rigaku) using Cu-K $\alpha$  radiation ( $\lambda = 1.54 \text{ \AA}$ ). The X-ray photoelectron spectroscopy (XPS, Thermo ESCALAB 250XI) was used to analyze the surface chemical states.

**Electrochemical measurements:** The electrochemical measurements were performed on the electrochemical workstation (CHI 760E) using a three-electrode cell in 1M KOH. The Fe-NiCoP, graphite rod, and saturated calomel electrode (SCE) were used as the working electrode, counter electrode, and reference electrode, respectively. The Linear sweep voltammetry (LSV) was measured at the scan rate of 2 mV s<sup>-1</sup>. The Tafel slope was calculated according to the curves of the overpotential versus the logarithm of current density. All potentials were converted to a reversible hydrogen electrode (RHE) using the equation:  $E_{RHE} = E_{SCE} + 0.059pH + 0.241$ . The electrochemical

impedance spectroscopy (EIS) was measured in the frequency range of 0.01 Hz ~ 10<sup>5</sup> Hz at the amplitude of 5 mV. The electrochemical active surface area (*ECSA*) was calculated using the

equation:  $ECSA = \frac{C_{dl}}{C_s}$ , where  $C_{dl}$  is the double layer capacitance calculated from cyclic voltammetry (CV) curves at different scan rates,  $C_s$  represents the general specific capacitance (0.04 mF cm<sup>-2</sup>). The

HER turnover frequency (*TOF*) could be calculated according to the following equation:<sup>1-3</sup>

$$TOF = \frac{J \times N_A}{2n \times F \times ECSA} \quad (4)$$

where  $J$  is the current density,  $N_A$  is the Avogadro's number ( $6.02 \times 10^{23}$ ),  $n$  is the number of active sites ( $2.02 \times 10^{15} \text{ cm}^{-2}$ ),  $F$  is the Faraday constant ( $96485 \text{ C mol}^{-1}$ ), and  $ECSA$  is the electrochemical active surface area.

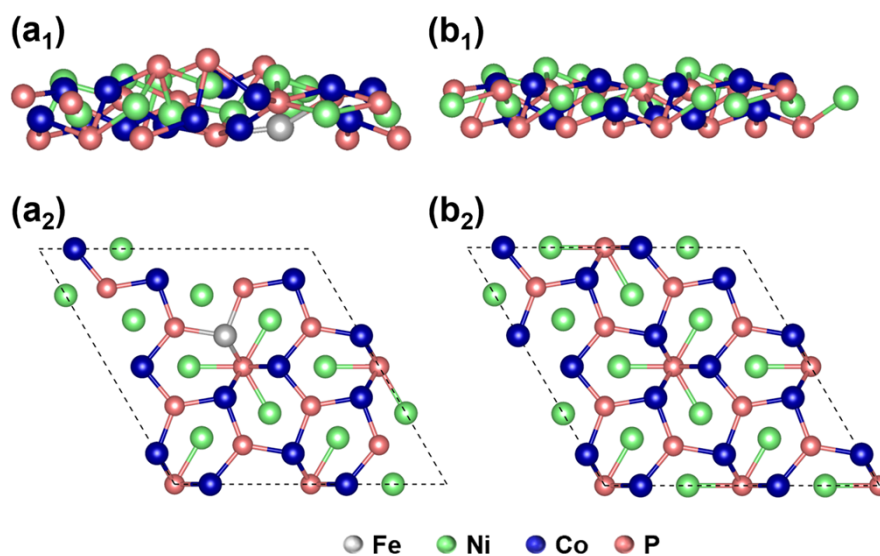

**Fig. S1** Calculated models of (a<sub>1</sub>) Fe-NiCoP and (b<sub>1</sub>) NiCoP. H\* adsorption models of (a<sub>2</sub>) Fe-NiCoP and (b<sub>2</sub>) NiCoP.

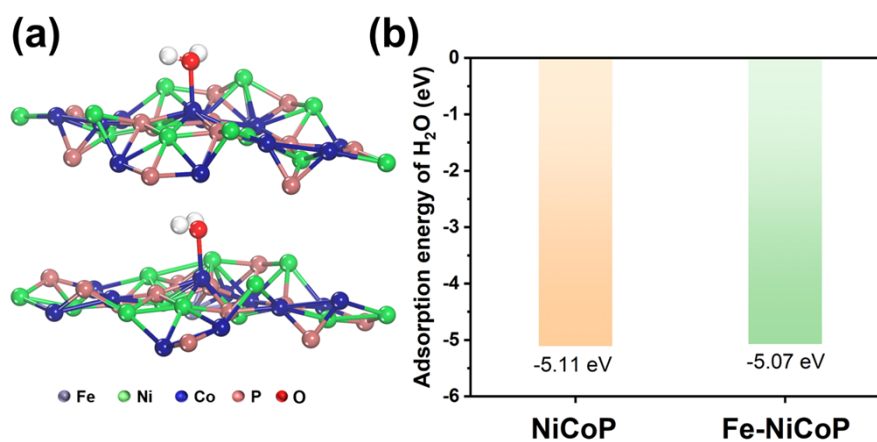

**Fig. S2** (a) H<sub>2</sub>O adsorption models of NiCoP and Fe-NiCoP. (b) H<sub>2</sub>O adsorption energy.

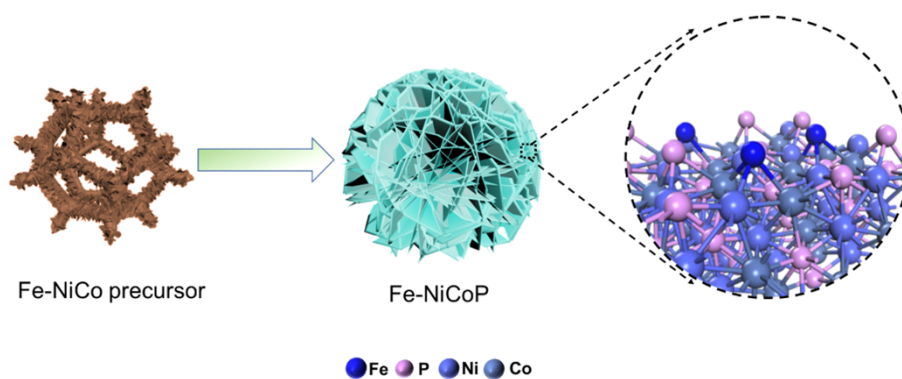

**Fig. S3** Schematic illustration of the fabrication process of Fe-NiCoP.

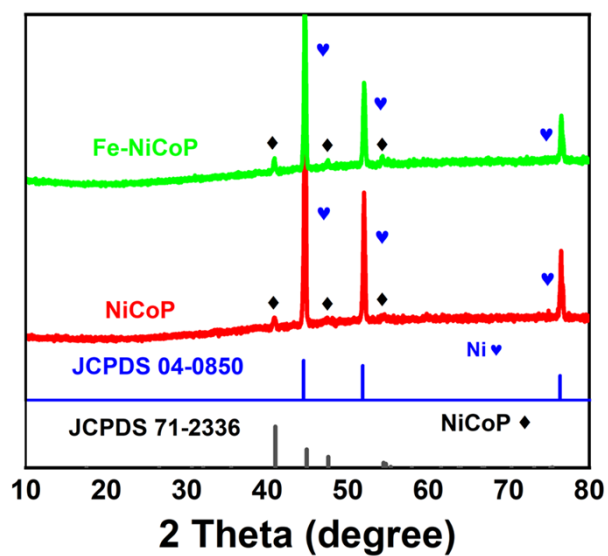

**Fig. S4** XRD patterns of Fe-NiCoP and NiCoP.

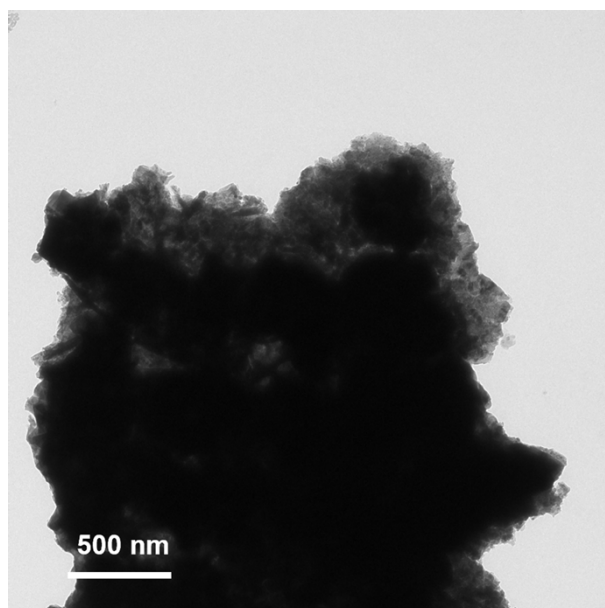

**Fig. S5** TEM image of Fe-NiCoP.

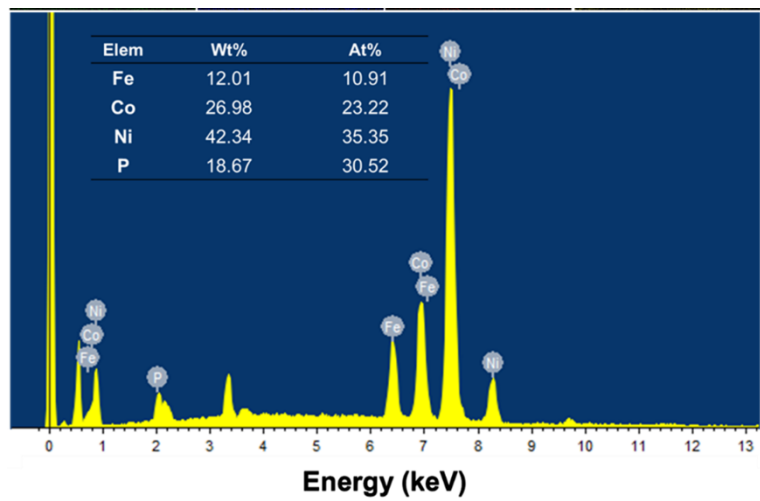

**Fig. S6** The energy dispersive spectroscopy mapping of Fe-NiCoP.

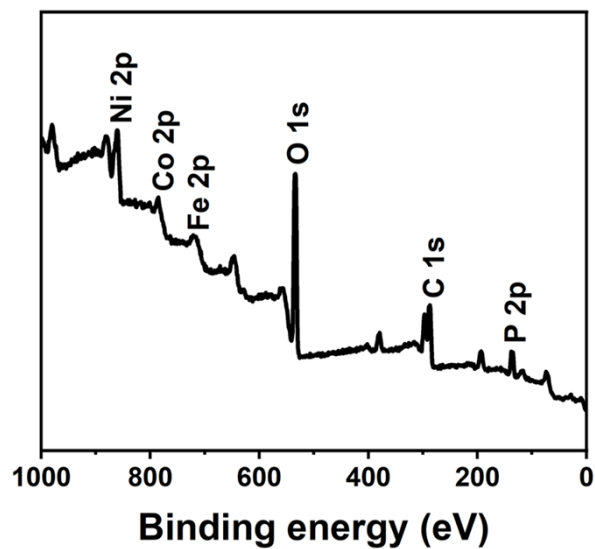

Fig. S7 XPS survey profile of Fe-NiCoP.

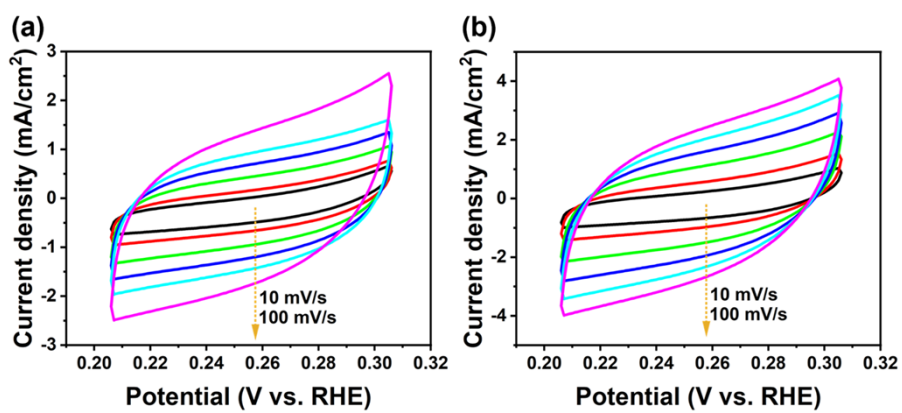

Fig. S8 Cyclic voltammety curves of (a) NiCoP and (b) Fe-NiCoP.

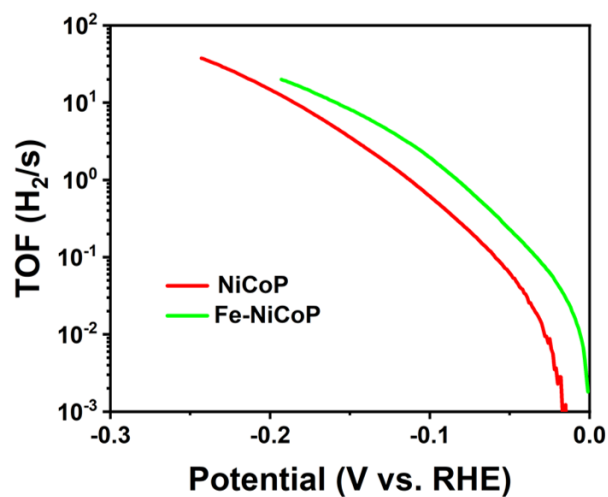

**Fig. S9** Comparison of TOF values of NiCoP and Fe-NiCoP.

**Table S1** Parameters of the theoretical models

| Samples  | a (Å)   | b (Å)   | c (Å)  | $\alpha^\circ$ | $\beta^\circ$ | $\gamma^\circ$ |
|----------|---------|---------|--------|----------------|---------------|----------------|
| NiCoP    | 11.6088 | 11.6088 | 3.3331 | 90             | 90            | 120            |
| Fe-NiCoP | 11.6297 | 11.6297 | 3.3313 | 90             | 90            | 120            |



**Table S2** Comparison of HER activity with other reported catalysts

| Materials                             | Electrolytes | Overpotential (mV, 10 mA/cm <sup>2</sup> ) | Tafel slope (mV/dec) | TOF (s <sup>-1</sup> ) | Ref.      |
|---------------------------------------|--------------|--------------------------------------------|----------------------|------------------------|-----------|
| S-NiCoP                               | 1 M KOH      | 102                                        | 63.3                 | 0.024@100 mV           | 1         |
| Ce-CoMoP/MoP                          | 1 M KOH      | 188                                        | 72                   | 0.082@200 mV           | 4         |
| Fe-CoP                                | 1 M KOH      | 115                                        | 72                   | /                      | 5         |
| Ni(OH) <sub>2</sub> /MoS <sub>2</sub> | 1 M KOH      | 227                                        | 105                  | 6@300 mV               | 6         |
| CoP/ZIF-67                            | 1 M KOH      | 154                                        | 85.1                 | 0.0477@180 mV          | 7         |
| C-CoP <sub>4</sub>                    | 1 M KOH      | 123                                        | 131                  | /                      | 8         |
| FeCoP <sub>2</sub> @NPPC              | 1 M KOH      | 150                                        | 79                   | /                      | 9         |
| NiFeP@C                               | 1 M KOH      | 160                                        | 75.8                 | /                      | 10        |
| CoFe/N <sub>H</sub> -C NS             | 1 M KOH      | 230                                        | 97.5                 | /                      | 11        |
| Fe-NiCoP                              | 1 M KOH      | 84                                         | 67.8                 | 1.95@100 mV            | This Work |

**Table S3** The simulated data from EIS curves

| Samples  | $R_s/\Omega$ | $R_{ct}/\Omega$ |
|----------|--------------|-----------------|
| NiCoP    | 1.46         | 3.61            |
| Fe-NiCoP | 1.36         | 2.86            |

## References

- 1 Y. Qi, L. Zhang, L. Sun, G. Chen, Q. Luo, H. Xin, J. Peng, Y. Li and F. Ma, *Nanoscale*, 2020, **12**, 1985-1993.
- 2 Y. Zhang, K. E. Arpino, Q. Yang, N. Kikugawa, D. A. Sokolov, C. W. Hicks, J. Liu, C. Felser and G. Li, *Nat. Commun.*, 2022, **13**, 7784.
- 3 L. Li, Z. Qin, L. Ries, S. Hong, T. Michel, J. Yang, C. Salameh, M. Bechelany, P. Miele, D. Kaplan, M. Chhowalla and D. Voiry, *ACS Nano*, 2019, **13**, 6824-6834.
- 4 T. Chen, Y. Fu, W. Liao, Y. Zhang, M. Qian, H. Dai, X. Tong and Q. Yang, *Energy Fuels*, 2021, **35**, 14169-14176.
- 5 M. Qian, X. Tong, Z. Chen, W. Liao, Y. Fu, H. Dai, Q. Yang and T. Chen, *Ionics*, 2022, **28**, 2301-2307.
- 6 G. Zhao, Y. Lin, K. Rui, Q. Zhou, Y. Chen, S. X. Dou and W. Sun, *Nanoscale*, 2018, **10**, 19074-19081.
- 7 Y.-L. Meng, J. Tang, X. Chen, Z.-Y. Niu, Y.-H. Zhao, Y. Pan, X.-F. Wang, X.-Z. Song and Z. Tan, *Inorg. Chem. Commun.*, 2021, **134**, 109058.
- 8 C. Wang, G. Sui, D. Guo, J. Li, L. Zhang, S. Li, J. Xin, D.-F. Chai and W. Guo, *J. Colloid Interf. Sci.*, 2021, **599**, 577-585.
- 9 Y.-N. Wang, Z.-J. Yang, D.-H. Yang, L. Zhao, X.-R. Shi, G. Yang and B.-H. Han, *ACS Appl. Mater. Interfaces*, 2021, **13**, 8832-8843.
- 10 Q. Kang, M. Li, J. Shi, Q. Lu and Feng Gao, *ACS Appl. Mater. Interfaces*, 2020, **12**, 19447-19456.
- 11 S. Chen, F. Bi, K. Xiang, Y. Zhang, P. Hao, M. Li, B. Zhao and X. Guo, *ACS Sustainable Chem. Eng.*, 2019, **7**, 15278-15288.
